# Supplementary material for: Explaining ethnic disparities in lung function among young adults: A pilot investigation
Source: PubMed Central journal article supplement (PMC5456386; doi:10.1371/journal.pone.0178962), 2017-06-02
Supplement: pone.0178962.s007.pdf [file pone.0178962.s007.pdf]

# ELIGIBILITY QUESTIONNAIRE

## (STAGE 1)

### ***Instructions***

*The inclusion questionnaire will be designed using Qualtrics, which is an online survey system offered by Imperial College London. The inclusion questionnaire will be completed online by the participants and will be available to the participants via the website.*

*If participants answer **Yes** to Questions 1.1 and 1.2, if they are between 18 and 23 years of age and if they consider themselves as White or South Asian ethnicity (i.e. English/Welsh/Scottish/Northern Irish/British, Irish, Gypsy or Irish Traveller, Any other White background, White and Asian, Indian, Pakistani, Bangladeshi, Any other Asian background) and answer **Yes** to Question 1.5 then they are eligible to participate in the study and the safety questions will be asked (Questions 2.1 to 2.7). If participants are eligible and it is safe for them to participate then the contact details (Questions 3.1 to 3.5) will be asked. Eligible participants will be informed that they will be contacted by email or phone to book a study visit.*

*No safety questions will be asked or contact details will be collected from the participants if they are not eligible to participate. The obtained information would not allow us to track the non-eligible participant and the answers to the questions do not contain any sensitive information.*

## 1. Demographic information

1.1. Are you a student at Imperial College London?

Yes   
No

1.2. Are you born in the United Kingdom (England, Scotland, Wales, Northern Ireland)?

Yes   
No

1.3. What is your age range?

<18yrs   
18-23   
24-27   
>27yrs

1.4. To which of the ethnic group do you consider that you belong?

*(Choose one option that best describes your ethnic group or background)*

### White

English / Welsh / Scottish / Northern Irish / British   
Irish   
Gypsy or Irish Traveller   
Any other White background, please describe:   
\_\_\_\_\_

### Mixed / Multiple ethnic groups

White and Black Caribbean   
White and Black African   
White and Asian   
Any other Mixed / Multiple ethnic background, please describe:   
\_\_\_\_\_

### Asian / Asian British

Indian   
Pakistani   
Bangladeshi   
Chinese   
Any other Asian background, please describe:   
\_\_\_\_\_

### Black / African / Caribbean / Black British

Caribbean   
African   
Any other Black / African / Caribbean background, please describe:   
\_\_\_\_\_

### Other ethnic group

Arab   
Any other ethnic group, please describe:   
\_\_\_\_\_

1.5. Were at least three of your grandparents born in United Kingdom, Western-Europe, South-Asia (Pakistan, India, Nepal, Bangladesh, Bhutan, Sri Lanka) or East-Africa (Kenya, Tanzania, Uganda)?

Yes   
No

**2. Safety Questions**

2.1. In the past three months have you had any surgery on your chest or abdomen?

Yes   
No

2.2. Have you had a heart attack within the past three months?

Yes   
No

2.3. Do you have a detached retina or have you had eye surgery within the past three months?

Yes   
No

2.4. Have you been hospitalized for any other heart problem within the past month?

Yes   
No

2.5. Are you in the last trimester of pregnancy?

Yes   
No

2.6. Are you currently taking medication for tuberculosis?

Yes   
No

2.7. Have you had a pneumothorax within the past three months?

Yes   
No

**3. Contact details**

3.1. What is your Surname? \_\_\_\_\_

3.2. What is your Name? \_\_\_\_\_

3.3. What is your date of birth?

\_\_\_\_\_/\_\_\_\_\_/\_\_\_\_\_  
d d / m m / y y y y

3.4. What is your Phone number? \_\_\_\_\_

3.5. What is your Imperial College London email address? \_\_\_\_\_

3.6. When would it suit you to have the study visit?

|           | Morning<br>(8-11am)      | Lunch time<br>(11am-2pm) | Afternoon<br>(2-5pm)     |
|-----------|--------------------------|--------------------------|--------------------------|
| Monday    | <input type="checkbox"/> | <input type="checkbox"/> | <input type="checkbox"/> |
| Tuesday   | <input type="checkbox"/> | <input type="checkbox"/> | <input type="checkbox"/> |
| Wednesday | <input type="checkbox"/> | <input type="checkbox"/> | <input type="checkbox"/> |
| Thursday  | <input type="checkbox"/> | <input type="checkbox"/> | <input type="checkbox"/> |
| Friday    | <input type="checkbox"/> | <input type="checkbox"/> | <input type="checkbox"/> |

ID \_\_\_\_\_

Date: \_\_\_\_\_ / \_\_\_\_\_ / \_\_\_\_\_  
          d      d          m      m          y      y          y      y

## ELIGIBILITY QUESTIONNAIRE (STAGE 2)

### **Instructions**

*The Eligibility questionnaire (stage 2) contains questions which are necessary to assess whether it is safe for the participant to perform spirometry. If any of the Questions 1.1 through 1.9 is **Yes** then it is not safe for the participant to perform the lung function testing. Therefore, the participant will be excluded from the study.*

### **Safety Questions**

1. I just want to check the safety questions that you answered when you volunteered and check that nothing has changed.

1.1. Have you had any surgery on your chest or abdomen?

Yes   
No

1.2. Have you had a heart attack within the past three months?

Yes   
No

1.3. Do you have a detached retina or have you had eye surgery within the past three months?

Yes   
No

1.4. Have you been hospitalized for any other heart problem within the past month?

Yes   
No

1.5. Are you in the last trimester of pregnancy?

Yes   
No

1.6. Does the participant have a resting pulse of greater than 120 beats per minute?

Yes   
No

1.7. Are you currently taking medication for tuberculosis?

Yes   
No

1.8. Have you had a pneumothorax within the past three months?

Yes   
No

1.9. *Is there some other reason why this participant should not perform the spirometry maneuver?*  
If **yes**, record reason.

Yes   
No

---

*If the answer to any of Questions 1.2. through 1.9. is "Yes", then the participant will be excluded from the study.*

2. Researcher ID \_\_\_\_\_

ID \_\_\_\_\_

Date: \_\_\_\_\_ / \_\_\_\_\_ / \_\_\_\_\_  
          d      d      m      m      y      y      y      y

## MEASUREMENT QUESTIONNAIRE

### **Instructions**

The Measurements questionnaire contains questions related to respiratory disease and/or symptoms and will record the results of the anthropometric and cardiovascular measurement and lung function testing.

### **1. Demography**

1.1. What is the participant's sex?

Male   
Female

### **2. Respiratory infection**

2.1 Have you had a respiratory infection (cold) in the last three weeks?

Yes   
No

### **3. Medications for breathing**

3.1. Have you taken any medications for breathing in the last 24 hours?

Yes   
No

If yes, record name/type of medication(s) used.

If Question 3.1 is yes and the medication used includes any of the types below, go to question 3.2. If no, go to question 4

| TYPE OF MEDICATION                                                                  | EXAMPLES                                |                                                               |
|-------------------------------------------------------------------------------------|-----------------------------------------|---------------------------------------------------------------|
| Short-acting beta-2 agonist                                                         | albuterol, salbutamol                   | 6 hours prior to clinic visit                                 |
| Anticholinergic inhaler                                                             | Atrovent, ipratropium                   | 6 hours prior to clinic visit                                 |
| Long-acting beta-2 agonist (including combination preparations that contain a LABA) | Serevent, Advair, formoterol, Symbicort | 12 hours prior to clinic visit                                |
| Oral beta-2 agonist                                                                 | Albuterol                               | 12 hours prior to clinic visit                                |
| Oral theophylline                                                                   | Theodur                                 | 12-24 hours prior to clinic visit, depending upon preparation |
| Long-acting anticholinergic                                                         | Spiriva, tiotropium                     | 24 hours prior to clinic visit                                |

3.2. Did you use a short acting beta agonist or anticholinergic inhaler, either alone or in combination with some other product, in the last six hours?

Yes   
No

3.3 Did you use a long acting beta agonist or oral beta 2 agonist, either alone or in combination with some other product, in the last 12 hours?

Yes   
No

3.4. Did you use an oral theophyllin/ long acting anticholinergic, either alone or in combination with some other product, in the last 24 hours?

Yes   
No

### **4. Smoking**

4.1. When did you last smoke?

i) \_\_\_\_\_ hrs ago  
ii) \_\_\_\_\_ days ago

Enter 999 if non smoker or ex smoker (has not smoked in the last month)

ID \_\_\_\_\_

Date: \_\_\_\_\_ / \_\_\_\_\_ / \_\_\_\_\_  
          d      d      m      m      y      y      y      y

**5. Cardiovascular measurements**

|                                  |                  |
|----------------------------------|------------------|
| 5.1.A. Pulse                     | _____ bpm        |
| 5.1.B. Pulse                     | _____ bpm        |
| 5.1.C. Pulse                     | _____ bpm        |
| 5.2.A. Blood pressure (Syst/Dia) | _____/____ mm Hg |
| 5.2.B. Blood pressure (Syst/Dia) | _____/____ mm Hg |
| 5.2.C. Blood pressure (Syst/Dia) | _____/____ mm Hg |

**6. Anthropometric measurements**

|                                   |                |
|-----------------------------------|----------------|
| 6.1. Height                       | _____ cm       |
| 6.2. Weight                       | _____._____ kg |
| 6.3.A Long bone length (ulna)     | _____ cm       |
| 6.3.B Long bone length (ulna)     | _____ cm       |
| 6.4.A Long bone length (demispan) | _____ cm       |
| 6.4.B Long bone length (demispan) | _____ cm       |

**7. Measurements Compliance – Prebronchodilator Spirometry**

|                                                                                            |                              |
|--------------------------------------------------------------------------------------------|------------------------------|
| 7.1. Acceptable pre-bronchodilator test completed?                                         | Yes <input type="checkbox"/> |
|                                                                                            | No <input type="checkbox"/>  |
| 7.2. Unable to obtain satisfactory spirometry (check one)?                                 |                              |
| The participant did not understand the instructions                                        | <input type="checkbox"/>     |
| The participant was unable to physically cooperate                                         | <input type="checkbox"/>     |
| refused                                                                                    | <input type="checkbox"/>     |
| not applicable                                                                             | <input type="checkbox"/>     |
| 7.3. Were any adverse events related to the spirometry maneuver observed by the evaluator? | Yes <input type="checkbox"/> |
|                                                                                            | No <input type="checkbox"/>  |
| If yes, please describe the event                                                          |                              |
| _____                                                                                      |                              |
| _____                                                                                      |                              |

ID \_\_\_\_\_

Date: \_\_\_\_\_ / \_\_\_\_\_ / \_\_\_\_\_  
          d      d      m      m      y      y      y      y

7.4. If the participant had a condition that would affect the result of their spirometry test (e.g., kyphosis, missing limbs, etc) note that condition here

\_\_\_\_\_  
\_\_\_\_\_

**8. Measurement Compliance - Bronchodilator**

8.1. Bronchodilator administered?

Yes

No

**9. Measurements Compliance – Postbronchodilator Spirometry**

9.1. Acceptable post-bronchodilator test completed?

Yes

No

9.2. Unable to obtain satisfactory spirometry (check one)?

The participant did not understand the instructions

The participant was unable to physically cooperate

refused

not applicable

9.3. Were any adverse events related to the spirometry maneuver observed by the evaluator?

Yes

No

If yes, please describe the event

\_\_\_\_\_  
\_\_\_\_\_

9.4. If the participant had a condition that would affect the result of their spirometry test (e.g., kyphosis, missing limbs, etc) note that condition here

\_\_\_\_\_  
\_\_\_\_\_

**10. Cardiovascular measurements before completing study visit**

10.1.A. Pulse \_\_\_\_\_ bpm

10.1.B. Pulse \_\_\_\_\_ bpm

10.2.A. Blood pressure (Syst/Dia) \_\_\_\_\_ / \_\_\_\_\_ mm Hg

10.2.B. Blood pressure (Syst/Dia) \_\_\_\_\_ / \_\_\_\_\_ mm Hg

11. Researcher ID

\_\_\_\_\_

ID \_\_\_\_\_

Date: \_\_\_\_\_ / \_\_\_\_\_ / \_\_\_\_\_  
                  d    d       m       m       y       y       y       y

## CORE QUESTIONNAIRE

### PART A – Respiratory Symptoms, disorders and comorbidities

*These questions pertain mainly to your chest. Please answer yes or no if possible. If you are in doubt about whether your answer is yes or no, please answer no.*

#### **Cough**

1. Do you usually cough when you don't have a cold? Yes   
[If **yes**, continue with Question 1A; If **no**, skip to Question 2] No

1A. Are there months in which you cough on most days? Yes   
[If **yes**, ask both Questions 1B & 1C; If **no**, skip to Question 1] No

1B. Do you cough on most days for as much as three months each year? Yes   
No

1C. For how many years have you had this cough? Less than 2 years   
2-5 years   
More than 5 years

#### **Phlegm**

2. Do you usually bring up phlegm from your chest, or do you usually have phlegm in your chest that is difficult to bring up when you don't have a cold? Yes   
No   
[If **yes**, continue with Question 2A; If **no**, skip to Question 3]

2A. Are there months in which you have this phlegm on most days? Yes   
[If **yes**, ask both Questions 2B & 2C; If **no**, skip to Question 3] No

2B. Do you bring up this phlegm on most days for as much as three months each year? Yes   
No

2C. For how many years have you had this phlegm? Less than 2 years   
2-5 years   
More than 5 years

#### **Wheezing/Whistling**

3. Have you had wheezing or whistling in your chest at any time in the last 12 months? Yes   
No   
[If **yes**, ask both Questions 3A & 3B; If **no**, skip to Question 4]

3A. In the last 12 months, have you had this wheezing or whistling only when you have a cold? Yes   
No

3B. In the last 12 months, have you ever had an attack of wheezing or whistling that has made you feel short of breath? Yes   
No



ID \_\_\_\_\_  
Date: \_\_\_\_\_ / \_\_\_\_\_ / \_\_\_\_\_  
                  d      d          m      m          y      y          y      y

**Breathlessness**

4. Are you unable to walk due to a condition other than shortness of breath? Yes   
[If **yes** to Question 4, please describe this condition on the line below No   
and then skip to Question 5. If **no** or unsure, go directly to Question 20.]

Nature of condition(s): \_\_\_\_\_

5. Are you troubled by shortness of breath when hurrying on the Yes   
level or walking up a slight hill? No   
[If **yes**, ask Question 5A through 5D; If **no**, skip to Question 6]

5A. Do you have to walk slower than people of your age on Yes   
level ground because of shortness of breath? No   
Does not apply

5B. Do you ever have to stop for breath when walking at Yes   
your own pace on level ground? No   
Does not apply

5C. Do you ever have to stop for breath after walking Yes   
about 100 yards (or after a few minutes) on level ground? No   
Does not apply

5D. Are you too short of breath to leave the house or Yes   
short of breath on dressing or undressing? No   
Does not apply

**Diagnosed lung disease**

6. Has a doctor or other health care provider ever told you that Yes   
you have asthma, asthmatic bronchitis or allergic bronchitis? No   
[If **yes**, ask Question 6A. If **no**, skip to Question 7]

6A. Do you still have asthma, asthmatic bronchitis or allergic bronchitis? Yes   
No

7. Has a doctor or other health care provider ever told you that Yes   
you have chronic bronchitis? No   
[If **yes**, ask Question 7A. If **no**, skip to Question 8]

7A. Do you still have chronic bronchitis? Yes   
No

**Exacerbations**

8. Have you ever had a period when you had breathing problems that got so Yes   
bad that they interfered with your usual daily activities or caused you No   
to miss work? [If **yes**, ask Question 8A. If **no**, skip to Question 9]

8A. How many such episodes have you had in the past 12 months? \_\_\_\_\_ episodes  
[If 25A > 0, ask Questions 8B and 8C, else skip to Question 9]

8B. For how many of these episodes did you need to see a doctor or other health care provider in the \_\_\_\_\_ episodes  
past 12 months?

ID \_\_\_\_\_  
Date: \_\_\_\_\_/\_\_\_\_\_/\_\_\_\_\_  
                  d   d      m   m   y   y   y   y

8C. For how many of these episodes were you hospitalized overnight in the past 12 months?  
[If 8C > 0, ask Question 8C1, else skip to Question 9] \_\_\_\_\_ episodes

8C1. All together, for how many total days were you hospitalized overnight for breathing problems in  
the past 12 months? \_\_\_\_\_ days

**Comorbidities**

9. Has a doctor or other health care provide ever told you that you had:

|                 | Yes                      | No                       |
|-----------------|--------------------------|--------------------------|
| A. Hypertension | <input type="checkbox"/> | <input type="checkbox"/> |
| B. Diabetes     | <input type="checkbox"/> | <input type="checkbox"/> |
| C. Tuberculosis | <input type="checkbox"/> | <input type="checkbox"/> |

[If yes to 9C, then ask 9C1; otherwise, skip to Question 10]

9C1. Are you currently taking medicine for tuberculosis? Yes   
[If no to 9C1, then ask 9C2; otherwise, skip to Question 10] No

9C2. Have you ever taken medicine for tuberculosis? Yes   
No

10. Have you ever had an operation on your chest in which a part of your lung was removed?  
Yes   
No

11. Were you hospitalized as a child for breathing problems prior to the age of 10?  
Yes   
No   
Don't Know

12. Has a doctor or other health care professional told your father, mother, sister or brother that they had a diagnosis of emphysema, chronic bronchitis or COPD?  
Yes   
No

**PART B - Quality of life**

13. In general, would you say your health is: (*Check one*)

- Excellent
- Very good
- Good
- Fair
- Poor

14. The following questions are about activities you might do during a typical day. Does ***your health now limit*** you in these activities? If so, how much?

|                                                                                                             | Yes, limited a lot       | Yes, limited a little    | Not limited at all       |
|-------------------------------------------------------------------------------------------------------------|--------------------------|--------------------------|--------------------------|
| 14a. <b>Moderate activities</b> , such as moving a table, pushing a vacuum cleaner, bowling or playing golf | <input type="checkbox"/> | <input type="checkbox"/> | <input type="checkbox"/> |
| 14b. Climbing <b>several</b> flights of stairs                                                              | <input type="checkbox"/> | <input type="checkbox"/> | <input type="checkbox"/> |

15. **During the past 4 weeks**, have you had any of the following problems with your work or other regular daily activities **as a result of your physical health**?

|                                                                  | No, none of the time     | Yes, a little of the time | Yes, some of the time    | Yes, most of the time    | Yes, all the time        |
|------------------------------------------------------------------|--------------------------|---------------------------|--------------------------|--------------------------|--------------------------|
| 15a. Accomplished <b>less</b> than you would like                | <input type="checkbox"/> | <input type="checkbox"/>  | <input type="checkbox"/> | <input type="checkbox"/> | <input type="checkbox"/> |
| 15b. Were limited in the <b>kind</b> of work or other activities | <input type="checkbox"/> | <input type="checkbox"/>  | <input type="checkbox"/> | <input type="checkbox"/> | <input type="checkbox"/> |

16. **During the past 4 weeks**, have you had any of the following problems with your work or other regular daily activities **as a result of any emotional problems** (such as feeling depressed or anxious)?

|                                                                        | No, none of the time     | Yes, a little of the time | Yes, some of the time    | Yes, most of the time    | Yes, all the time        |
|------------------------------------------------------------------------|--------------------------|---------------------------|--------------------------|--------------------------|--------------------------|
| 16a. <b>Accomplished less</b> than you would like                      | <input type="checkbox"/> | <input type="checkbox"/>  | <input type="checkbox"/> | <input type="checkbox"/> | <input type="checkbox"/> |
| 16b. Didn't do work or other activities as <b>carefully</b> as usually | <input type="checkbox"/> | <input type="checkbox"/>  | <input type="checkbox"/> | <input type="checkbox"/> | <input type="checkbox"/> |

17. **During the past 4 weeks**, how much did **pain** interfere with your normal work (including both work outside the home and housework)?

- Not at all
- Slightly
- Moderately
- Quite a bit
- Extremely

ID \_\_\_\_\_

Date: \_\_\_\_\_ / \_\_\_\_\_ / \_\_\_\_\_  
d d m m y y y y

18. These questions are about how you feel and how things have been with you **during the past 4 weeks**. For each question, please give the one answer that comes closest to the way you have been feeling. How much of the time during the **past 4 weeks**

|                                          | All of the time          | Most of the time         | A good bit of the time   | Some of the time         | A little of the time     | None of the time         |
|------------------------------------------|--------------------------|--------------------------|--------------------------|--------------------------|--------------------------|--------------------------|
| 18a. Have you felt calm and peaceful?    | <input type="checkbox"/> | <input type="checkbox"/> | <input type="checkbox"/> | <input type="checkbox"/> | <input type="checkbox"/> | <input type="checkbox"/> |
| 18b. Did you have a lot of energy?       | <input type="checkbox"/> | <input type="checkbox"/> | <input type="checkbox"/> | <input type="checkbox"/> | <input type="checkbox"/> | <input type="checkbox"/> |
| 18c. Have you felt downhearted and blue? | <input type="checkbox"/> | <input type="checkbox"/> | <input type="checkbox"/> | <input type="checkbox"/> | <input type="checkbox"/> | <input type="checkbox"/> |

19. **During the past 4 weeks**, how much of the time has your **physical health or emotional problems** interfered with your social activities (like visiting with friends, relatives, etc.)?

- All the time
- Most of the time
- Some of the time
- A little of the time
- None of the time

20. Now we'd like to ask you some questions about how your health may have changed. Compared to one year ago,

|                                                                                                                       | Much better              | Slightly better          | About the same           | Slightly worse           | Much worse               |
|-----------------------------------------------------------------------------------------------------------------------|--------------------------|--------------------------|--------------------------|--------------------------|--------------------------|
| 20a. How would you rate your <b>physical health</b> in general now?                                                   | <input type="checkbox"/> | <input type="checkbox"/> | <input type="checkbox"/> | <input type="checkbox"/> | <input type="checkbox"/> |
| 20b. How would you rate your <b>emotional problems</b> (such as feeling anxious, depressed or irritable) <b>now</b> ? | <input type="checkbox"/> | <input type="checkbox"/> | <input type="checkbox"/> | <input type="checkbox"/> | <input type="checkbox"/> |

ID \_\_\_\_\_

Date: \_\_\_\_\_/\_\_\_\_\_/\_\_\_\_\_  
                   d      d      m      m      y      y      y      y

**PART C - Management Section**

Now I am going to ask you about medicines that you may be taking to help with your breathing. I want to know about medicines that you take on a regular basis and medicines that you may take only for the relief of symptoms. I would like you to tell me each medicine that you take, what form do you take it in, and how often you take it each month.

21. In the past 12 months, have you taken any medications for your breathing (including medications for nasal congestion)? Yes   
 If participant does not take any medications to help their breathing, skip to Question 27. No

|                                                                                                                                            |                                      |                                      |                                      |                                      |
|--------------------------------------------------------------------------------------------------------------------------------------------|--------------------------------------|--------------------------------------|--------------------------------------|--------------------------------------|
| 21.A. Medication Name (not entered)                                                                                                        |                                      |                                      |                                      |                                      |
| 21.B. Medication Code                                                                                                                      |                                      |                                      |                                      |                                      |
| 21.C. Formulation                                                                                                                          | Pills <input type="checkbox"/>       | Pills <input type="checkbox"/>       | Pills <input type="checkbox"/>       | Pills <input type="checkbox"/>       |
|                                                                                                                                            | Inhaler <input type="checkbox"/>     | Inhaler <input type="checkbox"/>     | Inhaler <input type="checkbox"/>     | Inhaler <input type="checkbox"/>     |
|                                                                                                                                            | Nebulizer <input type="checkbox"/>   | Nebulizer <input type="checkbox"/>   | Nebulizer <input type="checkbox"/>   | Nebulizer <input type="checkbox"/>   |
|                                                                                                                                            | Liquid <input type="checkbox"/>      | Liquid <input type="checkbox"/>      | Liquid <input type="checkbox"/>      | Liquid <input type="checkbox"/>      |
|                                                                                                                                            | Suppository <input type="checkbox"/> | Suppository <input type="checkbox"/> | Suppository <input type="checkbox"/> | Suppository <input type="checkbox"/> |
|                                                                                                                                            | Injection <input type="checkbox"/>   | Injection <input type="checkbox"/>   | Injection <input type="checkbox"/>   | Injection <input type="checkbox"/>   |
|                                                                                                                                            | Other <input type="checkbox"/>       | Other <input type="checkbox"/>       | Other <input type="checkbox"/>       | Other <input type="checkbox"/>       |
| 21.D. Is the medicine taken on most days or just when you have symptoms or both? (If 'most days' ask Q26E if both ask 'both' 26E and Q26F) | Most days <input type="checkbox"/>   | Most days <input type="checkbox"/>   | Most days <input type="checkbox"/>   | Most days <input type="checkbox"/>   |
|                                                                                                                                            | Symptoms <input type="checkbox"/>    | Symptoms <input type="checkbox"/>    | Symptoms <input type="checkbox"/>    | Symptoms <input type="checkbox"/>    |
|                                                                                                                                            | Both <input type="checkbox"/>        | Both <input type="checkbox"/>        | Both <input type="checkbox"/>        | Both <input type="checkbox"/>        |
|                                                                                                                                            | Other <input type="checkbox"/>       | Other <input type="checkbox"/>       | Other <input type="checkbox"/>       | Other <input type="checkbox"/>       |
| 21.E. When you are taking the medication how many days a week do you take it?                                                              | __ days/week                         | __ days/week                         | __ days/week                         | __ days/week                         |
| 21.F. When you are taking the medication, how many months in the past 12 months have you taken it?                                         | 0-3 <input type="checkbox"/>         | 0-3 <input type="checkbox"/>         | 0-3 <input type="checkbox"/>         | 0-3 <input type="checkbox"/>         |
|                                                                                                                                            | 4-6 <input type="checkbox"/>         | 4-6 <input type="checkbox"/>         | 4-6 <input type="checkbox"/>         | 4-6 <input type="checkbox"/>         |
|                                                                                                                                            | 7-9 <input type="checkbox"/>         | 7-9 <input type="checkbox"/>         | 7-9 <input type="checkbox"/>         | 7-9 <input type="checkbox"/>         |
|                                                                                                                                            | 10-12 <input type="checkbox"/>       | 10-12 <input type="checkbox"/>       | 10-12 <input type="checkbox"/>       | 10-12 <input type="checkbox"/>       |

22. Please tell me about any other products that you take or things you do to help your breathing that you have not already told me about.

| Medicine or Activity | Code  |
|----------------------|-------|
|                      | _____ |
|                      | _____ |
|                      | _____ |
|                      | _____ |

ID \_\_\_\_\_  
Date: \_\_\_\_\_/\_\_\_\_\_/\_\_\_\_\_  
                  d    d      m      m      y      y      y      y

**PART D - Smoking**

Now I am going to ask you about smoking. First I will ask about cigarettes, including hand rolled cigarettes, and then I will ask about other items that are smoked.

|                                                                                                                                                                                                   |                                                                               |
|---------------------------------------------------------------------------------------------------------------------------------------------------------------------------------------------------|-------------------------------------------------------------------------------|
| 23.1. Have you <u>ever</u> smoked <b>cigarettes</b> ?                                                                                                                                             | Yes <input type="checkbox"/>                                                  |
|                                                                                                                                                                                                   | No <input type="checkbox"/>                                                   |
| <i>("Yes," means more than 20 packs of cigarettes in a lifetime or more than 1 cigarette each day for a year)<br/>[if yes, ask questions 23.2 through 23.5; otherwise, skip to Question 24.1]</i> |                                                                               |
| 23.2. How old were you when you first started regular cigarette smoking?                                                                                                                          | _____ years old                                                               |
| 23.3. <u>If you have stopped smoking</u> , how old were you when you last stopped?<br><i>(If the participant has not stopped smoking, record as code '999'.)</i>                                  | _____ years old                                                               |
| 23.4. On average over the entire time that you smoke(d), about how many cigarettes per day/per week do (did) you smoke? i) _____ cigarettes/day<br>ii) _____ cigarettes/week                      |                                                                               |
| 23.5. On average over the entire time that you smoke(d), do (did) you primarily smoke manufactured or hand-rolled cigarettes?                                                                     | Manufactured <input type="checkbox"/><br>Hand-rolled <input type="checkbox"/> |

|                                                                                                                                                                                  |                              |
|----------------------------------------------------------------------------------------------------------------------------------------------------------------------------------|------------------------------|
| 24.1. Have you <u>ever</u> smoked a <b>water pipe</b> ?                                                                                                                          | Yes <input type="checkbox"/> |
|                                                                                                                                                                                  | No <input type="checkbox"/>  |
| <i>("Yes," means more than 1 water pipe per week for one year at any time in your life)<br/>[if yes, ask questions 24.2 through 24.4; otherwise, skip to Question 25.1]</i>      |                              |
| 24.2. How old were you when you first started regular water pipe smoking?                                                                                                        | _____ years old              |
| 24.3. <u>If you have stopped smoking</u> , how old were you when you last stopped?<br><i>(If the participant has not stopped smoking, record as code '999'.)</i>                 | _____ years old              |
| 24.4. On average over the entire time that you smoke(d), about how many water pipe per day/per week do (did) you smoke? i) _____ water pipes /day<br>ii) _____ water pipes /week |                              |

**Second hand smoke exposure**

|                                                                                                           |                                                                                                    |
|-----------------------------------------------------------------------------------------------------------|----------------------------------------------------------------------------------------------------|
| 25.1. Not counting yourself, how many people in your household smoke regularly?                           | _____                                                                                              |
| 25.2. Do people smoke regularly in the room where you work?                                               | Yes <input type="checkbox"/><br>No <input type="checkbox"/><br>Don't work <input type="checkbox"/> |
| 25.3. How many hours per day, are you exposed to other people's tobacco smoke in the following locations? |                                                                                                    |
| 25.3.1. At home                                                                                           | _____ hours                                                                                        |
| 25.3.2. In workplace                                                                                      | _____ hours                                                                                        |
| 25.3.3. Bars, restaurants, cinemas or similar social settings                                             | _____ hours                                                                                        |
| 25.3.4. Elsewhere                                                                                         | _____ hours                                                                                        |

ID \_\_\_\_\_

Date: \_\_\_\_\_ / \_\_\_\_\_ / \_\_\_\_\_

d      d      m      m      y      y      y      y

**PART E – Family history**

***Family Composition***

26. How many siblings do you have? \_\_\_\_\_  
*If the answer to Question 26 is >0 then ask Question 27 to 28, otherwise skip to Question 29.1.*

27. How many older siblings do you have? \_\_\_\_\_

28. How many older brothers do you have? \_\_\_\_\_

***Family history – Education***

29.1 What is the highest level of schooling your mother has completed?

Primary School

Middle School

High School

Some College (Trade/Professional/Community)

Four Year College/University

None

Unknown

29.2 What is the highest level of schooling your maternal grandmother has completed?

Primary School

Middle School

High School

Some College (Trade/Professional/Community)

Four Year College/University

None

Unknown

29.3 What is the highest level of schooling your maternal grandfather has completed?

Primary School

Middle School

High School

Some College (Trade/Professional/Community)

Four Year College/University

None

Unknown

29.4 What is the highest level of schooling your father has completed?

Primary School

Middle School

High School

Some College (Trade/Professional/Community)

Four Year College/University

None

Unknown

29.5 What is the highest level of schooling your paternal grandmother has completed?

Primary School

Middle School

High School

Some College (Trade/Professional/Community)

Four Year College/University

None

Unknown

ID \_\_\_\_\_  
 Date: \_\_\_\_\_/\_\_\_\_\_/\_\_\_\_\_  
                   d      d      m      m      y      y      y      y

29.6 What is the highest level of schooling your paternal grandfather has completed?

Primary School   
 Middle School   
 High School   
 Some College (Trade/Professional/Community)   
 Four Year College/University   
 None   
 Unknown

***Family history – Occupation***

30.1. What has been your father's usual occupation or job? \_\_\_\_\_  
*If the he has never worked then enter "never worked" and go to question 31.1*

30.2. What does/did he actually do in his work (describe) \_\_\_\_\_  
 \_\_\_\_\_

30.3. What industry does he work in? \_\_\_\_\_  
*If father unemployed put 999*

30.4. For how many years has your father worked at this job? \_\_\_\_\_ years

30.5. Is your father:

A manager working for an employer?   
 A foreman or supervisor working for an employer?   
 Working for an employer, but neither a manager, supervisor or foreman?   
 Self-employed?

30.6. Enter ISCO code here: \_\_\_\_\_

31.1. What has been your paternal grandfather's usual occupation or job? \_\_\_\_\_  
*If the he has never worked then enter "never worked" and go to question 32.1*

31.2. What does/did he actually do in his work (describe) \_\_\_\_\_  
 \_\_\_\_\_

31.3. What industry did he work in? \_\_\_\_\_  
*If grandfather unemployed put 999*

31.4. For how many years has your paternal grandfather worked at this job? \_\_\_\_\_ years

31.5. Has your paternal grandfather been a farmer?  
*If yes go to Question 31.6., otherwise skip to Question 31.7.* Yes   
 No

31.6. Has your paternal grandfather been:  
*If Question 31.6. is being completed then skip to 32.1.*

An owner, but didn't work on the farm   
 An owner, but worked on the farm   
 A tenant, worked on the farmer but didn't own the farm   
 Employed on the farm but not a tenant or owner



ID \_\_\_\_\_  
Date: \_\_\_\_\_/\_\_\_\_\_/\_\_\_\_\_  
                  d      d      m      m      y      y      y      y

31.7. Was your paternal grandfather:  
A manager working for an employer?   
A foreman or supervisor working for an employer?   
Working for an employer, but neither a manager, supervisor or foreman?   
Self-employed?

31.8. Enter ISCO code here: \_\_\_\_\_

32.1. Did your paternal grandmother work outside the home? Yes   
No   
*If Question 32.1 is Yes then go to Question 32.2 to 32.9, otherwise skip to Question 33.1*

32.2. What was your paternal grandmother's usual occupation or job? \_\_\_\_\_

32.3. What does/did she actually do in her work (describe) \_\_\_\_\_  
\_\_\_\_\_

32.4. What industry did she work in? \_\_\_\_\_  
*If grandmother unemployed put 999*

32.5. For how many years has your paternal grandmother worked at this job? \_\_\_\_\_  
years

32.6. Has your paternal grandmother been a farmer? Yes   
*If yes go to 32.7. else skip to 32.8.* No

32.7. Has your paternal grandmother been:  
*If Question 32.7. is being completed then skip to 33.1.*  
An owner, but didn't work on the farm   
An owner, but worked on the farm   
A tenant, worked on the farmer but didn't own the farm   
Employed on the farm but not a tenant or owner

32.8. Was your paternal grandmother:  
A manager working for an employer?   
A foreman or supervisor working for an employer?   
Working for an employer, but neither a manager, supervisor or foreman?   
Self-employed?

32.9. Enter ISCO code here: \_\_\_\_\_

33.1. Has or does your mother work outside the home? Yes   
*If Question 33.1. is Yes then go to Question 33.2 to 33.7,* No   
*otherwise skip to Question 34.1*

33.2. What has been your mother's usual occupation or job? \_\_\_\_\_

33.3. What does/did she actually do in her work (describe) \_\_\_\_\_  
\_\_\_\_\_

33.4. What industry does she work in? \_\_\_\_\_  
*If mother unemployed put 999*

ID \_\_\_\_\_  
Date: \_\_\_\_\_/\_\_\_\_\_/\_\_\_\_\_  
                  d      d      m      m      y      y      y      y

33.5. For how many years has your mother worked at this job? \_\_\_\_\_ years

33.6. Is your mother:

A manager working for an employer?

A foreman or supervisor working for an employer?

Working for an employer, but neither a manager, supervisor or foreman?

Self-employed?

33.7. Enter ISCO code here: \_\_\_\_\_

34.1. What has been your maternal grandfather's usual occupation or job? \_\_\_\_\_  
*If the he has never worked then enter "never worked" and go to question 35.1*

34.2. What does/did he actually do in his work (describe) \_\_\_\_\_  
\_\_\_\_\_

34.3. What industry did he work in? \_\_\_\_\_  
*If grandfather unemployed put 999*

34.4. For how many years has your maternal grandfather worked at this job? \_\_\_\_\_ years

34.5. Has your maternal grandfather been a farmer?  
*If yes go to Question 34.6., otherwise skip to Question 34.7.* Yes   
No

34.6. Has your maternal grandfather been:  
*If Question 34.6. is being completed then skip to 35.1*

An owner, but didn't work on the farm

An owner, but worked on the farm

A tenant, worked on the farmer but didn't own the farm

Employed on the farm but not a tenant or owner

34.7. Was your maternal grandfather:

A manager working for an employer?

A foreman or supervisor working for an employer?

Working for an employer, but neither a manager, supervisor or foreman?

Self-employed?

34.8. Enter ISCO code here: \_\_\_\_\_

35.1. Did your maternal grandmother work outside the home?  
Yes   
No   
*If Question 35.1 is Yes then go to Question 35.2 to 35.9, otherwise skip to Question 36.1*

35.2. What was your maternal grandmother's usual occupation or job? \_\_\_\_\_

35.3. What does/did she actually do in her work (describe) \_\_\_\_\_  
\_\_\_\_\_

35.4. What industry did she work in? \_\_\_\_\_  
*If grandmother unemployed put 999*

35.5. For how many years has your maternal grandmother worked at this job? \_\_\_\_\_ years

ID \_\_\_\_\_

Date: \_\_\_\_\_/\_\_\_\_\_/\_\_\_\_\_

d d m m y y y y

35.6. Has your maternal grandmother been a farmer?  
*If yes go to 35.6. else skip to 35.8.* Yes   
No

35.7. Has your maternal grandmother been:  
*If Question 35.7. is being completed then skip to 36.1.*

An owner, but didn't work on the farm

An owner, but worked on the farm

A tenant, worked on the farmer but didn't own the farm

Employed on the farm but not a tenant or owner

35.8. Was your maternal grandmother:

A manager working for an employer?

A foreman or supervisor working for an employer?

Working for an employer, but neither a manager, supervisor or foreman?

Self-employed?

35.9. Enter ISCO code here: \_\_\_\_\_

***Family history – Place of birth***

36.1. Where was your mother born? City/region: \_\_\_\_\_  
Country: \_\_\_\_\_

36.2. Where was your maternal grandmother born? City/region: \_\_\_\_\_  
Country: \_\_\_\_\_

36.3. Where was your maternal grandfather born? City/region: \_\_\_\_\_  
Country: \_\_\_\_\_

36.4. Where was your father born? City/region: \_\_\_\_\_  
Country: \_\_\_\_\_

36.5. Where was your paternal grandmother born? City/region: \_\_\_\_\_  
Country: \_\_\_\_\_

36.6. Where was your paternal grandfather born? City/region: \_\_\_\_\_  
Country: \_\_\_\_\_

***Family history – Place of childhood***

37.1. What term best describes the place your mother lived most of the time during her childhood?

Farm

Village in rural area

Small town

Suburb or a city

Don't know

37.2. What term best describes the place your maternal grandmother lived most of the time during her childhood?

Farm

Village in rural area

Small town

Suburb or a city

Don't know

ID \_\_\_\_\_  
 Date: \_\_\_\_\_/\_\_\_\_\_/\_\_\_\_\_  
                   d      d      m      m      y      y      y      y

|                                                                                                                         |                       |                          |
|-------------------------------------------------------------------------------------------------------------------------|-----------------------|--------------------------|
| 37. 3. What term best describes the place your <u>maternal grandfather</u> lived most of the time during his childhood? | Farm                  | <input type="checkbox"/> |
|                                                                                                                         | Village in rural area | <input type="checkbox"/> |
|                                                                                                                         | Small town            | <input type="checkbox"/> |
|                                                                                                                         | Suburb or a city      | <input type="checkbox"/> |
|                                                                                                                         | Don't know            | <input type="checkbox"/> |
| 37. 4. What term best describes the place your <u>father</u> lived most of the time during his childhood?               | Farm                  | <input type="checkbox"/> |
|                                                                                                                         | Village in rural area | <input type="checkbox"/> |
|                                                                                                                         | Small town            | <input type="checkbox"/> |
|                                                                                                                         | Suburb or a city      | <input type="checkbox"/> |
|                                                                                                                         | Don't know            | <input type="checkbox"/> |
| 37. 5. What term best describes the place your <u>paternal grandmother</u> lived most of the time during her childhood? | Farm                  | <input type="checkbox"/> |
|                                                                                                                         | Village in rural area | <input type="checkbox"/> |
|                                                                                                                         | Small town            | <input type="checkbox"/> |
|                                                                                                                         | Suburb or a city      | <input type="checkbox"/> |
|                                                                                                                         | Don't know            | <input type="checkbox"/> |
| 37. 6. What term best describes the place your <u>paternal grandfather</u> lived most of the time during his childhood? | Farm                  | <input type="checkbox"/> |
|                                                                                                                         | Village in rural area | <input type="checkbox"/> |
|                                                                                                                         | Small town            | <input type="checkbox"/> |
|                                                                                                                         | Suburb or a city      | <input type="checkbox"/> |
|                                                                                                                         | Don't know            | <input type="checkbox"/> |

***Family history – Smoking***

|                                                                     |            |                          |
|---------------------------------------------------------------------|------------|--------------------------|
| 38.1. Did your <u>mother</u> smoke regularly before your pregnancy? | Yes        | <input type="checkbox"/> |
|                                                                     | No         | <input type="checkbox"/> |
|                                                                     | Don't know | <input type="checkbox"/> |
| 38.2. Did your <u>father</u> smoke regularly before your pregnancy? | Yes        | <input type="checkbox"/> |
|                                                                     | No         | <input type="checkbox"/> |
|                                                                     | Don't know | <input type="checkbox"/> |
| 38.3. Did your <u>mother</u> smoke regularly during your pregnancy? | Yes        | <input type="checkbox"/> |
|                                                                     | No         | <input type="checkbox"/> |
|                                                                     | Don't know | <input type="checkbox"/> |
| 38.4. Did your <u>father</u> smoke regularly during your pregnancy? | Yes        | <input type="checkbox"/> |
|                                                                     | No         | <input type="checkbox"/> |
|                                                                     | Don't know | <input type="checkbox"/> |
| 38.5. Did your <u>mother</u> smoke regularly during your childhood? | Yes        | <input type="checkbox"/> |
|                                                                     | No         | <input type="checkbox"/> |
|                                                                     | Don't know | <input type="checkbox"/> |

ID \_\_\_\_\_  
Date: \_\_\_\_ / \_\_\_\_ / \_\_\_\_  
                  d    d    m    m    y    y    y    y

|                                                                     |            |                          |
|---------------------------------------------------------------------|------------|--------------------------|
| 38.6. Did your <u>father</u> smoke regularly during your childhood? | Yes        | <input type="checkbox"/> |
|                                                                     | No         | <input type="checkbox"/> |
|                                                                     | Don't know | <input type="checkbox"/> |
| 38.7. Does your <u>mother</u> smoke regularly nowadays?             | Yes        | <input type="checkbox"/> |
|                                                                     | No         | <input type="checkbox"/> |
|                                                                     | Don't know | <input type="checkbox"/> |
| 38.8. Does your <u>father</u> smoke regularly nowadays?             | Yes        | <input type="checkbox"/> |
|                                                                     | No         | <input type="checkbox"/> |
|                                                                     | Don't know | <input type="checkbox"/> |

**PART F - Birth linkage, GP and withdrawal details**

***Birth linkage***

*This section will only be completed if the participant consents to accessing birth weight information (See consent form).*

|                                                                                                                                                        |                     |                          |
|--------------------------------------------------------------------------------------------------------------------------------------------------------|---------------------|--------------------------|
| 39. Is your birth name different from your current name?                                                                                               | Yes                 | <input type="checkbox"/> |
|                                                                                                                                                        | No                  | <input type="checkbox"/> |
| <i>If the answer to Questions 39 is "Yes", then proceed with Questions 39.1 and 39.2. If the answer to Question 39 is No then skip to Question 40.</i> |                     |                          |
| 39.1. What was your Birth Surname?                                                                                                                     | _____               |                          |
| 39.2. What was your Birth Name?                                                                                                                        | _____               |                          |
| 40. What is your NHS number?                                                                                                                           | ____ / ____ / _____ |                          |

***General practice contact details***

*This section will only be completed if the participant consents to sending the results of the lung function testing to their GP (See consent form).*

|                                                        |       |
|--------------------------------------------------------|-------|
| 41.1. What is the name of your GP practice?            | _____ |
| 41.2. What is the contact address of your GP practice? | _____ |
|                                                        | _____ |
|                                                        | _____ |

***Withdrawal***

|                                                                                              |       |
|----------------------------------------------------------------------------------------------|-------|
| 42. Define the circumstance under which the participant withdrew if the participant withdrew | _____ |
|                                                                                              | _____ |
|                                                                                              | _____ |

**53. Researcher ID** \_\_\_\_\_
